# Supplementary material
Source: Springer Nature journal article supplement (https://www.springermedizin.de/resource/supplementary/12936_2009_925_MOESM3_ESM.pdf/9548548)

Hb at Day 0 Hb at Day 28

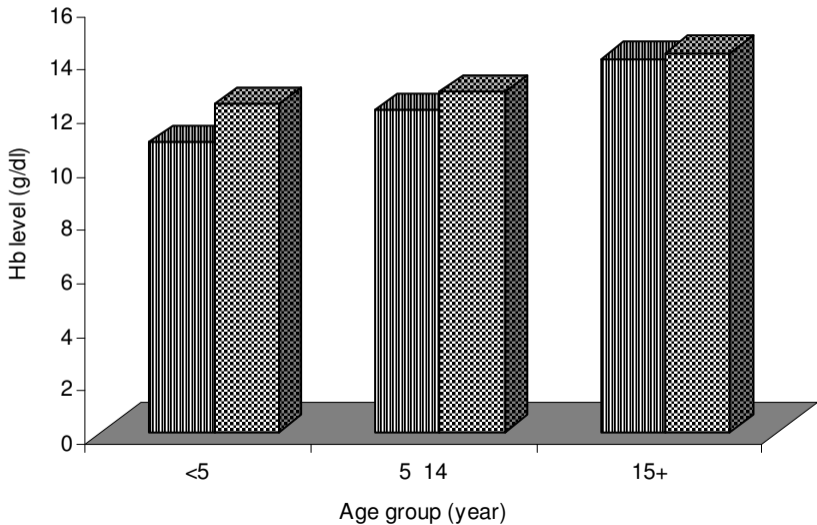

Supplement: MOESM3 [file 9548548]
